# Supplementary material
Source: publisher figshare collection journal article supplement (https://acs.figshare.com/ndownloader/files/4760986)
Supplement: Supplementary file 1 [file 4760986]

 
data_5-nitro-2-hydroxyimidazoldioxane  
 
_audit_creation_method            SHELXL-97 
_chemical_name_systematic 
; 
 'Phenol, 2-[4,5-bis(4-methoxyphenyl)-1H-imidazol-2-yl]-4-nitro' 
 '1,4-Dioxane clathrate' 
; 
_chemical_name_common             ? 
_chemical_melting_point           ? 
_chemical_formula_moiety          'C23 H19 N3 O5, C4 H8 O2' 
_chemical_formula_sum 
 'C27 H27 N3 O7' 
_chemical_formula_weight          505.52 
 
loop_ 
 _atom_type_symbol 
 _atom_type_description 
 _atom_type_scat_dispersion_real 
 _atom_type_scat_dispersion_imag 
 _atom_type_scat_source 
 'C'  'C'   0.0033   0.0016 
 'International Tables Vol C Tables 4.2.6.8 and 6.1.1.4' 
 'O'  'O'   0.0106   0.0060 
 'International Tables Vol C Tables 4.2.6.8 and 6.1.1.4' 
 'N'  'N'   0.0061   0.0033 
 'International Tables Vol C Tables 4.2.6.8 and 6.1.1.4' 
 'H'  'H'   0.0000   0.0000 
 'International Tables Vol C Tables 4.2.6.8 and 6.1.1.4' 
 
_symmetry_cell_setting            triclinic 
_symmetry_space_group_name_H-M    'P -1'  
 
loop_ 
 _symmetry_equiv_pos_as_xyz 
 'x, y, z' 
 '-x, -y, -z' 
 
_cell_length_a                    8.954(2) 
_cell_length_b                    9.943(2) 
_cell_length_c                    14.841(3) 
_cell_angle_alpha                 90.99(2) 
_cell_angle_beta                  97.60(2) 
_cell_angle_gamma                 105.38(2) 
_cell_volume                      1260.9(5) 
_cell_formula_units_Z             2 
_cell_measurement_temperature     293(2) 
_cell_measurement_reflns_used     none 
_cell_measurement_theta_min       1.018 
_cell_measurement_theta_max       25.028 
 
_exptl_crystal_description        plate 
_exptl_crystal_colour             yellow
_exptl_crystal_size_max           0.78 
_exptl_crystal_size_mid           0.57 
_exptl_crystal_size_min           0.12 
_exptl_crystal_density_meas       ? 
_exptl_crystal_density_diffrn     1.331 
_exptl_crystal_density_method     'not measured' 
_exptl_crystal_F_000              532 
_exptl_absorpt_coefficient_mu     0.097 
_exptl_absorpt_correction_type    ? 
_exptl_absorpt_correction_T_min   0.9279 
_exptl_absorpt_correction_T_max   0.9884 
_exptl_absorpt_process_details    ? 
 
_exptl_special_details 
; 
 ? 
; 
 
_diffrn_ambient_temperature       293(2) 
_diffrn_radiation_wavelength      0.71073 
_diffrn_radiation_type            MoK\a 
_diffrn_radiation_source          'fine-focus sealed tube' 
_diffrn_radiation_monochromator   graphite 
_diffrn_measurement_device_type   'KappaCCD' 
_diffrn_measurement_method        'phi scan' 
_diffrn_detector_area_resol_mean  95 
_diffrn_standards_number          none 
_diffrn_standards_interval_count  none 
_diffrn_standards_interval_time   none 
_diffrn_standards_decay_%         none 
_diffrn_reflns_number             7522 
_diffrn_reflns_av_R_equivalents   0.0409 
_diffrn_reflns_av_sigmaI/netI     0.1060 
_diffrn_reflns_limit_h_min        -10 
_diffrn_reflns_limit_h_max        10 
_diffrn_reflns_limit_k_min        -11 
_diffrn_reflns_limit_k_max        11 
_diffrn_reflns_limit_l_min        -17 
_diffrn_reflns_limit_l_max        17 
_diffrn_reflns_theta_min          1.39 
_diffrn_reflns_theta_max          25.05 
_reflns_number_total              4433 
_reflns_number_gt                 2040 
_reflns_threshold_expression      >2sigma(I) 
 
_computing_data_collection        'Collect (Nonius, 2000)' 
_computing_cell_refinement        'Denzo SMN (Otwinowski & Minor 1997)'  
_computing_data_reduction         'Denzo SMN (Otwinowski & Minor 1997)' 
_computing_structure_solution     'SHELXS-97 (Sheldrick, 1997)' 
_computing_structure_refinement   'SHELXL-97 (Sheldrick, 1997)' 
_computing_molecular_graphics     'Ortep-3 for Windows (Farrugia, 1999)' 
_computing_publication_material   ? 
 
_refine_special_details 
; 
 Refinement of F^2^ against ALL reflections.  The weighted R-factor wR and 
 goodness of fit S are based on F^2^, conventional R-factors R are based 
 on F, with F set to zero for negative F^2^. The threshold expression of 
 F^2^ > 2sigma(F^2^) is used only for calculating R-factors(gt) etc. and is 
 not relevant to the choice of reflections for refinement.  R-factors based 
 on F^2^ are statistically about twice as large as those based on F, and R- 
 factors based on ALL data will be even larger. 
; 
 
_refine_ls_structure_factor_coef  Fsqd  
_refine_ls_matrix_type            full 
_refine_ls_weighting_scheme       calc  
_refine_ls_weighting_details 
 'calc w=1/[\s^2^(Fo^2^)+(0.0754P)^2^+0.0000P] where P=(Fo^2^+2Fc^2^)/3' 
_atom_sites_solution_primary      direct 
_atom_sites_solution_secondary    difmap 
_atom_sites_solution_hydrogens    geom 
_refine_ls_hydrogen_treatment     mixed 
_refine_ls_extinction_method      SHELXL 
_refine_ls_extinction_coef        0.081(5) 
_refine_ls_extinction_expression 
 'Fc^*^=kFc[1+0.001xFc^2^\l^3^/sin(2\q)]^-1/4^' 
_refine_ls_number_reflns          4433 
_refine_ls_number_parameters      337 
_refine_ls_number_restraints      0 
_refine_ls_R_factor_all           0.1011 
_refine_ls_R_factor_gt            0.0479 
_refine_ls_wR_factor_ref          0.1332 
_refine_ls_wR_factor_gt           0.1128 
_refine_ls_goodness_of_fit_ref    0.802 
_refine_ls_restrained_S_all       0.802 
_refine_ls_shift/su_max           0.000 
_refine_ls_shift/su_mean          0.000 
 
loop_ 
 _atom_site_label 
 _atom_site_type_symbol 
 _atom_site_fract_x 
 _atom_site_fract_y 
 _atom_site_fract_z 
 _atom_site_U_iso_or_equiv 
 _atom_site_adp_type 
 _atom_site_occupancy 
 _atom_site_symmetry_multiplicity 
 _atom_site_calc_flag 
 _atom_site_refinement_flags 
 _atom_site_disorder_assembly 
 _atom_site_disorder_group 
O1 O 0.0839(2) -0.0388(2) 0.16581(14) 0.0947(7) Uani 1 1 d . . . 
O2 O 0.5549(2) 0.8687(2) 0.05681(12) 0.0824(6) Uani 1 1 d . . . 
O3 O 0.7057(2) 0.24407(19) 0.59328(14) 0.0745(6) Uani 1 1 d . . . 
H3O3 H 0.6568 0.2539 0.5442 0.111(13) Uiso 1 1 calc R . . 
O4 O 1.1843(2) 0.8305(2) 0.67135(15) 0.0830(6) Uani 1 1 d . . . 
O5 O 1.2392(2) 0.7314(2) 0.79459(13) 0.0926(7) Uani 1 1 d . . . 
N1 N 0.6252(2) 0.3608(2) 0.44987(13) 0.0565(6) Uani 1 1 d . . . 
N2 N 0.7316(2) 0.5815(2) 0.42687(13) 0.0549(5) Uani 1 1 d . . . 
H2 H 0.7903 0.6658 0.4360 0.066 Uiso 1 1 calc R . . 
N3 N 1.1642(2) 0.7288(3) 0.71906(17) 0.0673(6) Uani 1 1 d . . . 
C1 C 0.1923(3) 0.0733(3) 0.21257(18) 0.0664(8) Uani 1 1 d . . . 
C2 C 0.1835(3) 0.2089(3) 0.21079(17) 0.0657(8) Uani 1 1 d . . . 
H2A H 0.0993 0.2306 0.1762 0.079 Uiso 1 1 calc R . . 
C3 C 0.3018(3) 0.3146(3) 0.26131(16) 0.0607(7) Uani 1 1 d . . . 
H3 H 0.2952 0.4063 0.2603 0.073 Uiso 1 1 calc R . . 
C4 C 0.4286(3) 0.2845(3) 0.31279(15) 0.0530(7) Uani 1 1 d . . . 
C5 C 0.4335(3) 0.1464(3) 0.31310(17) 0.0622(7) Uani 1 1 d . . . 
H5 H 0.5178 0.1241 0.3470 0.075 Uiso 1 1 calc R . . 
C6 C 0.3172(3) 0.0417(3) 0.26470(18) 0.0680(8) Uani 1 1 d . . . 
H6 H 0.3223 -0.0504 0.2670 0.082 Uiso 1 1 calc R . . 
C7 C -0.0555(3) -0.0144(4) 0.1199(2) 0.1189(14) Uani 1 1 d . . . 
H7A H -0.1233 -0.1007 0.0919 0.178 Uiso 1 1 calc R . . 
H7B H -0.0297 0.0513 0.0739 0.178 Uiso 1 1 calc R . . 
H7C H -0.1076 0.0228 0.1628 0.178 Uiso 1 1 calc R . . 
C8 C 0.5684(3) 0.7794(3) 0.12473(17) 0.0599(7) Uani 1 1 d . . . 
C9 C 0.5866(3) 0.8363(3) 0.21255(18) 0.0663(7) Uani 1 1 d . . . 
H9 H 0.5885 0.9295 0.2222 0.080 Uiso 1 1 calc R . . 
C10 C 0.6018(3) 0.7555(3) 0.28555(18) 0.0626(7) Uani 1 1 d . . . 
H10 H 0.6133 0.7951 0.3442 0.075 Uiso 1 1 calc R . . 
C11 C 0.6004(2) 0.6164(3) 0.27398(16) 0.0520(6) Uani 1 1 d . . . 
C12 C 0.5844(3) 0.5630(3) 0.18560(17) 0.0628(7) Uani 1 1 d . . . 
H12 H 0.5845 0.4704 0.1756 0.075 Uiso 1 1 calc R . . 
C13 C 0.5684(3) 0.6429(3) 0.11177(17) 0.0669(8) Uani 1 1 d . . . 
H13 H 0.5575 0.6039 0.0531 0.080 Uiso 1 1 calc R . . 
C14 C 0.5423(4) 0.8189(4) -0.03490(18) 0.1000(11) Uani 1 1 d . . . 
H14A H 0.5364 0.8930 -0.0747 0.150 Uiso 1 1 calc R . . 
H14B H 0.4496 0.7428 -0.0493 0.150 Uiso 1 1 calc R . . 
H14C H 0.6325 0.7873 -0.0427 0.150 Uiso 1 1 calc R . . 
C15 C 0.5543(3) 0.3926(3) 0.36715(16) 0.0536(7) Uani 1 1 d . . . 
C16 C 0.6205(3) 0.5298(3) 0.35149(16) 0.0529(7) Uani 1 1 d . . . 
C17 C 0.7318(3) 0.4770(3) 0.48330(16) 0.0529(6) Uani 1 1 d . . . 
C18 C 0.8348(3) 0.4831(3) 0.56986(15) 0.0523(6) Uani 1 1 d . . . 
C19 C 0.9530(3) 0.6022(3) 0.60223(16) 0.0550(7) Uani 1 1 d . . . 
H19 H 0.9699 0.6816 0.5687 0.066 Uiso 1 1 calc R . . 
C20 C 1.0451(3) 0.6016(3) 0.68443(17) 0.0552(7) Uani 1 1 d . . . 
C21 C 1.0240(3) 0.4859(3) 0.73578(18) 0.0665(8) Uani 1 1 d . . . 
H21 H 1.0867 0.4882 0.7913 0.080 Uiso 1 1 calc R . . 
C22 C 0.9094(3) 0.3672(3) 0.70419(17) 0.0684(7) Uani 1 1 d . . . 
H22 H 0.8950 0.2882 0.7382 0.082 Uiso 1 1 calc R . . 
C23 C 0.8139(3) 0.3638(3) 0.62129(17) 0.0585(7) Uani 1 1 d . . . 
O1S1 O -0.0334(11) 0.6057(10) -0.0518(6) 0.190(3) Uiso 0.50 1 d P . . 
O1S2 O -0.0645(8) 0.6086(7) 0.0265(4) 0.1320(18) Uiso 0.50 1 d P . . 
O2S O 0.0833(2) 0.13661(19) 0.53266(12) 0.0704(5) Uani 1 1 d . . . 
C1S C 0.0986(6) 0.6346(6) 0.0219(3) 0.163(2) Uani 1 1 d . . . 
H1S1 H 0.1489 0.5613 0.0374 0.196 Uiso 1 1 calc R . . 
H1S2 H 0.1645 0.7296 0.0331 0.196 Uiso 1 1 calc R . . 
C2S C 0.1467(5) 0.5043(7) 0.0102(6) 0.249(4) Uani 1 1 d . . . 
H2S1 H 0.1180 0.5889 -0.0065 0.299 Uiso 1 1 calc R . . 
H2S2 H 0.2576 0.5148 0.0279 0.299 Uiso 1 1 calc R . . 
C3S C 0.1488(3) 0.0529(3) 0.47818(19) 0.0759(9) Uani 1 1 d . . . 
H3S1 H 0.2077 0.0023 0.5175 0.091 Uiso 1 1 calc R . . 
H3S2 H 0.2204 0.1129 0.4427 0.091 Uiso 1 1 calc R . . 
C4S C -0.0240(3) 0.0479(3) 0.58405(18) 0.0711(8) Uani 1 1 d . . . 
H4S1 H -0.0706 0.1042 0.6198 0.085 Uiso 1 1 calc R . . 
H4S2 H 0.0315 -0.0026 0.6256 0.085 Uiso 1 1 calc R . . 
 
loop_ 
 _atom_site_aniso_label 
 _atom_site_aniso_U_11 
 _atom_site_aniso_U_22 
 _atom_site_aniso_U_33 
 _atom_site_aniso_U_23 
 _atom_site_aniso_U_13 
 _atom_site_aniso_U_12 
O1 0.0739(13) 0.0797(17) 0.1099(16) -0.0281(13) 0.0027(11) -0.0079(11) 
O2 0.1115(15) 0.0756(16) 0.0618(13) 0.0128(11) 0.0032(11) 0.0320(12) 
O3 0.0852(12) 0.0571(14) 0.0682(13) 0.0109(10) -0.0005(11) 0.0016(10) 
O4 0.0821(13) 0.0613(15) 0.0919(15) 0.0045(12) -0.0074(11) 0.0050(11) 
O5 0.0917(14) 0.1001(18) 0.0676(13) -0.0097(12) -0.0221(11) 0.0110(12) 
N1 0.0603(12) 0.0506(15) 0.0531(13) 0.0022(11) 0.0036(10) 0.0078(11) 
N2 0.0624(12) 0.0437(14) 0.0512(12) -0.0008(11) 0.0031(10) 0.0044(10) 
N3 0.0636(14) 0.0669(19) 0.0678(17) -0.0088(14) 0.0007(12) 0.0162(13) 
C1 0.0574(16) 0.060(2) 0.0696(18) -0.0135(16) 0.0113(14) -0.0051(14) 
C2 0.0554(15) 0.072(2) 0.0645(17) -0.0045(16) 0.0023(13) 0.0109(15) 
C3 0.0602(15) 0.0558(19) 0.0636(16) -0.0005(14) 0.0074(13) 0.0124(13) 
C4 0.0539(15) 0.0468(18) 0.0531(15) -0.0010(13) 0.0079(12) 0.0050(12) 
C5 0.0558(15) 0.0526(19) 0.0738(18) 0.0038(14) 0.0083(13) 0.0073(13) 
C6 0.0644(17) 0.0520(19) 0.0820(19) -0.0004(15) 0.0154(15) 0.0037(14) 
C7 0.072(2) 0.139(4) 0.119(3) -0.043(3) -0.0119(19) 0.000(2) 
C8 0.0656(16) 0.060(2) 0.0527(16) 0.0096(15) 0.0017(12) 0.0176(14) 
C9 0.0825(18) 0.0542(19) 0.0637(18) 0.0020(16) 0.0089(14) 0.0220(14) 
C10 0.0773(17) 0.058(2) 0.0510(16) -0.0026(14) 0.0054(13) 0.0178(14) 
C11 0.0549(14) 0.0467(17) 0.0512(16) -0.0003(13) 0.0049(11) 0.0093(12) 
C12 0.0776(17) 0.0477(18) 0.0585(17) -0.0031(14) 0.0020(13) 0.0130(13) 
C13 0.0859(18) 0.060(2) 0.0498(16) -0.0032(15) -0.0004(13) 0.0154(15) 
C14 0.139(3) 0.106(3) 0.0543(19) 0.0175(18) 0.0041(18) 0.036(2) 
C15 0.0549(14) 0.0509(19) 0.0505(15) 0.0009(13) 0.0055(12) 0.0076(12) 
C16 0.0542(14) 0.0507(18) 0.0493(15) -0.0030(13) 0.0033(11) 0.0088(12) 
C17 0.0620(15) 0.0455(17) 0.0475(14) 0.0010(13) 0.0072(12) 0.0085(13) 
C18 0.0638(15) 0.0456(17) 0.0477(14) 0.0020(13) 0.0095(12) 0.0145(13) 
C19 0.0603(15) 0.0510(18) 0.0523(15) 0.0011(13) 0.0085(12) 0.0124(13) 
C20 0.0566(14) 0.0538(19) 0.0525(16) -0.0052(14) 0.0039(12) 0.0126(13) 
C21 0.0724(17) 0.074(2) 0.0527(16) 0.0007(16) 0.0017(13) 0.0231(16) 
C22 0.0864(19) 0.059(2) 0.0578(17) 0.0106(15) 0.0036(15) 0.0194(16) 
C23 0.0665(16) 0.0489(19) 0.0558(16) 0.0000(14) 0.0075(13) 0.0089(14) 
O2S 0.0850(12) 0.0476(12) 0.0719(12) -0.0043(10) 0.0178(10) 0.0037(9) 
C1S 0.124(4) 0.164(6) 0.170(4) -0.029(4) 0.023(3) -0.015(3) 
C2S 0.075(3) 0.143(5) 0.528(13) -0.052(7) 0.028(5) 0.040(3) 
C3S 0.0765(18) 0.063(2) 0.084(2) -0.0037(17) 0.0274(15) 0.0057(15) 
C4S 0.0931(19) 0.056(2) 0.0647(17) 0.0032(15) 0.0248(15) 0.0148(15) 
 
_geom_special_details 
; 
 All esds (except the esd in the dihedral angle between two l.s. planes) 
 are estimated using the full covariance matrix.  The cell esds are taken 
 into account individually in the estimation of esds in distances, angles 
 and torsion angles; correlations between esds in cell parameters are only 
 used when they are defined by crystal symmetry.  An approximate (isotropic) 
 treatment of cell esds is used for estimating esds involving l.s. planes. 
; 
 
loop_ 
 _geom_bond_atom_site_label_1 
 _geom_bond_atom_site_label_2 
 _geom_bond_distance 
 _geom_bond_site_symmetry_2 
 _geom_bond_publ_flag 
O1 C1 1.374(3) . ? 
O1 C7 1.422(4) . ? 
O2 C8 1.369(3) . ? 
O2 C14 1.420(3) . ? 
O3 C23 1.339(3) . ? 
O3 H3O3 0.8200 . ? 
O4 N3 1.232(3) . ? 
O5 N3 1.224(3) . ? 
N1 C17 1.327(3) . ? 
N1 C15 1.387(3) . ? 
N2 C17 1.346(3) . ? 
N2 C16 1.386(3) . ? 
N2 H2 0.8600 . ? 
N3 C20 1.456(3) . ? 
C1 C2 1.372(4) . ? 
C1 C6 1.384(4) . ? 
C2 C3 1.400(3) . ? 
C2 H2A 0.9300 . ? 
C3 C4 1.386(3) . ? 
C3 H3 0.9300 . ? 
C4 C5 1.385(3) . ? 
C4 C15 1.470(3) . ? 
C5 C6 1.373(3) . ? 
C5 H5 0.9300 . ? 
C6 H6 0.9300 . ? 
C7 H7A 0.9600 . ? 
C7 H7B 0.9600 . ? 
C7 H7C 0.9600 . ? 
C8 C13 1.367(4) . ? 
C8 C9 1.384(3) . ? 
C9 C10 1.374(4) . ? 
C9 H9 0.9300 . ? 
C10 C11 1.388(4) . ? 
C10 H10 0.9300 . ? 
C11 C12 1.382(3) . ? 
C11 C16 1.469(3) . ? 
C12 C13 1.379(4) . ? 
C12 H12 0.9300 . ? 
C13 H13 0.9300 . ? 
C14 H14A 0.9600 . ? 
C14 H14B 0.9600 . ? 
C14 H14C 0.9600 . ? 
C15 C16 1.373(3) . ? 
C17 C18 1.469(3) . ? 
C18 C19 1.390(3) . ? 
C18 C23 1.406(3) . ? 
C19 C20 1.380(3) . ? 
C19 H19 0.9300 . ? 
C20 C21 1.376(3) . ? 
C21 C22 1.370(4) . ? 
C21 H21 0.9300 . ? 
C22 C23 1.397(3) . ? 
C22 H22 0.9300 . ? 
O1S1 O1S2 1.232(8) . ? 
O1S1 C1S 1.463(8) . ? 
O1S1 C2S 1.485(9) 2_565 ? 
O1S2 C2S 1.238(7) 2_565 ? 
O1S2 C1S 1.426(7) . ? 
O2S C4S 1.432(3) . ? 
O2S C3S 1.433(3) . ? 
C1S H1S1 0.9700 . ? 
C1S H1S2 0.9700 . ? 
C2S O1S2 1.237(7) 2_565 ? 
C2S O1S1 1.485(9) 2_565 ? 
C2S H2S1 0.9700 . ? 
C2S H2S2 0.9700 . ? 
C3S C4S 1.486(3) 2_556 ? 
C3S H3S1 0.9700 . ? 
C3S H3S2 0.9700 . ? 
C4S C3S 1.486(3) 2_556 ? 
C4S H4S1 0.9700 . ? 
C4S H4S2 0.9700 . ? 
 
loop_ 
 _geom_angle_atom_site_label_1 
 _geom_angle_atom_site_label_2 
 _geom_angle_atom_site_label_3 
 _geom_angle 
 _geom_angle_site_symmetry_1 
 _geom_angle_site_symmetry_3 
 _geom_angle_publ_flag 
C1 O1 C7 117.2(3) . . ? 
C8 O2 C14 118.6(2) . . ? 
C23 O3 H3O3 109.5 . . ? 
C17 N1 C15 106.3(2) . . ? 
C17 N2 C16 108.1(2) . . ? 
C17 N2 H2 125.9 . . ? 
C16 N2 H2 125.9 . . ? 
O5 N3 O4 122.6(2) . . ? 
O5 N3 C20 119.0(3) . . ? 
O4 N3 C20 118.5(2) . . ? 
C2 C1 O1 124.9(3) . . ? 
C2 C1 C6 119.9(2) . . ? 
O1 C1 C6 115.2(3) . . ? 
C1 C2 C3 119.7(3) . . ? 
C1 C2 H2A 120.2 . . ? 
C3 C2 H2A 120.2 . . ? 
C4 C3 C2 121.0(3) . . ? 
C4 C3 H3 119.5 . . ? 
C2 C3 H3 119.5 . . ? 
C5 C4 C3 117.7(2) . . ? 
C5 C4 C15 119.8(2) . . ? 
C3 C4 C15 122.5(2) . . ? 
C6 C5 C4 121.8(3) . . ? 
C6 C5 H5 119.1 . . ? 
C4 C5 H5 119.1 . . ? 
C5 C6 C1 119.9(3) . . ? 
C5 C6 H6 120.0 . . ? 
C1 C6 H6 120.0 . . ? 
O1 C7 H7A 109.5 . . ? 
O1 C7 H7B 109.5 . . ? 
H7A C7 H7B 109.5 . . ? 
O1 C7 H7C 109.5 . . ? 
H7A C7 H7C 109.5 . . ? 
H7B C7 H7C 109.5 . . ? 
C13 C8 O2 125.2(2) . . ? 
C13 C8 C9 119.2(3) . . ? 
O2 C8 C9 115.6(3) . . ? 
C10 C9 C8 120.1(3) . . ? 
C10 C9 H9 119.9 . . ? 
C8 C9 H9 119.9 . . ? 
C9 C10 C11 121.6(2) . . ? 
C9 C10 H10 119.2 . . ? 
C11 C10 H10 119.2 . . ? 
C12 C11 C10 117.0(2) . . ? 
C12 C11 C16 120.8(2) . . ? 
C10 C11 C16 122.2(2) . . ? 
C13 C12 C11 121.9(3) . . ? 
C13 C12 H12 119.0 . . ? 
C11 C12 H12 119.0 . . ? 
C8 C13 C12 120.1(2) . . ? 
C8 C13 H13 119.9 . . ? 
C12 C13 H13 119.9 . . ? 
O2 C14 H14A 109.5 . . ? 
O2 C14 H14B 109.5 . . ? 
H14A C14 H14B 109.5 . . ? 
O2 C14 H14C 109.5 . . ? 
H14A C14 H14C 109.5 . . ? 
H14B C14 H14C 109.5 . . ? 
C16 C15 N1 109.2(2) . . ? 
C16 C15 C4 131.1(2) . . ? 
N1 C15 C4 119.7(2) . . ? 
C15 C16 N2 105.5(2) . . ? 
C15 C16 C11 133.2(2) . . ? 
N2 C16 C11 121.2(2) . . ? 
N1 C17 N2 110.8(2) . . ? 
N1 C17 C18 122.3(2) . . ? 
N2 C17 C18 126.9(2) . . ? 
C19 C18 C23 118.9(2) . . ? 
C19 C18 C17 122.4(2) . . ? 
C23 C18 C17 118.7(2) . . ? 
C20 C19 C18 119.5(3) . . ? 
C20 C19 H19 120.2 . . ? 
C18 C19 H19 120.2 . . ? 
C21 C20 C19 121.9(2) . . ? 
C21 C20 N3 119.2(2) . . ? 
C19 C20 N3 118.8(3) . . ? 
C22 C21 C20 119.2(2) . . ? 
C22 C21 H21 120.4 . . ? 
C20 C21 H21 120.4 . . ? 
C21 C22 C23 120.5(3) . . ? 
C21 C22 H22 119.7 . . ? 
C23 C22 H22 119.7 . . ? 
O3 C23 C22 117.8(3) . . ? 
O3 C23 C18 122.4(2) . . ? 
C22 C23 C18 119.9(2) . . ? 
O1S2 O1S1 C1S 63.2(5) . . ? 
O1S2 O1S1 C2S 53.2(5) . 2_565 ? 
C1S O1S1 C2S 99.3(6) . 2_565 ? 
O1S1 O1S2 C2S 74.0(6) . 2_565 ? 
O1S1 O1S2 C1S 66.3(5) . . ? 
C2S O1S2 C1S 114.9(5) 2_565 . ? 
C4S O2S C3S 109.5(2) . . ? 
O1S2 C1S O1S1 50.5(4) . . ? 
O1S2 C1S H1S1 118.6 . . ? 
O1S1 C1S H1S1 118.6 . . ? 
O1S2 C1S H1S2 118.6 . . ? 
O1S1 C1S H1S2 118.6 . . ? 
H1S1 C1S H1S2 116.0 . . ? 
O1S2 C2S O1S1 52.8(4) 2_565 2_565 ? 
O1S2 C2S H2S1 118.4 2_565 . ? 
O1S1 C2S H2S1 118.4 2_565 . ? 
O1S2 C2S H2S2 118.4 2_565 . ? 
O1S1 C2S H2S2 118.4 2_565 . ? 
H2S1 C2S H2S2 115.7 . . ? 
O2S C3S C4S 110.9(2) . 2_556 ? 
O2S C3S H3S1 109.5 . . ? 
C4S C3S H3S1 109.5 2_556 . ? 
O2S C3S H3S2 109.5 . . ? 
C4S C3S H3S2 109.5 2_556 . ? 
H3S1 C3S H3S2 108.0 . . ? 
O2S C4S C3S 110.1(2) . 2_556 ? 
O2S C4S H4S1 109.6 . . ? 
C3S C4S H4S1 109.6 2_556 . ? 
O2S C4S H4S2 109.6 . . ? 
C3S C4S H4S2 109.6 2_556 . ? 
H4S1 C4S H4S2 108.2 . . ? 
 
loop_ 
 _geom_torsion_atom_site_label_1 
 _geom_torsion_atom_site_label_2 
 _geom_torsion_atom_site_label_3 
 _geom_torsion_atom_site_label_4 
 _geom_torsion 
 _geom_torsion_site_symmetry_1 
 _geom_torsion_site_symmetry_2 
 _geom_torsion_site_symmetry_3 
 _geom_torsion_site_symmetry_4 
 _geom_torsion_publ_flag 
C7 O1 C1 C2 -6.9(4) . . . . ? 
C7 O1 C1 C6 172.8(2) . . . . ? 
O1 C1 C2 C3 -179.8(2) . . . . ? 
C6 C1 C2 C3 0.5(4) . . . . ? 
C1 C2 C3 C4 0.4(4) . . . . ? 
C2 C3 C4 C5 -0.5(4) . . . . ? 
C2 C3 C4 C15 -179.5(2) . . . . ? 
C3 C4 C5 C6 -0.3(4) . . . . ? 
C15 C4 C5 C6 178.8(2) . . . . ? 
C4 C5 C6 C1 1.2(4) . . . . ? 
C2 C1 C6 C5 -1.3(4) . . . . ? 
O1 C1 C6 C5 179.0(2) . . . . ? 
C14 O2 C8 C13 -1.1(4) . . . . ? 
C14 O2 C8 C9 177.5(2) . . . . ? 
C13 C8 C9 C10 -1.1(4) . . . . ? 
O2 C8 C9 C10 -179.8(2) . . . . ? 
C8 C9 C10 C11 0.4(4) . . . . ? 
C9 C10 C11 C12 0.6(4) . . . . ? 
C9 C10 C11 C16 178.4(2) . . . . ? 
C10 C11 C12 C13 -0.9(4) . . . . ? 
C16 C11 C12 C13 -178.7(2) . . . . ? 
O2 C8 C13 C12 179.3(2) . . . . ? 
C9 C8 C13 C12 0.8(4) . . . . ? 
C11 C12 C13 C8 0.2(4) . . . . ? 
C17 N1 C15 C16 0.1(3) . . . . ? 
C17 N1 C15 C4 -179.6(2) . . . . ? 
C5 C4 C15 C16 146.1(3) . . . . ? 
C3 C4 C15 C16 -34.9(4) . . . . ? 
C5 C4 C15 N1 -34.3(3) . . . . ? 
C3 C4 C15 N1 144.7(2) . . . . ? 
N1 C15 C16 N2 -0.8(3) . . . . ? 
C4 C15 C16 N2 178.9(2) . . . . ? 
N1 C15 C16 C11 175.2(2) . . . . ? 
C4 C15 C16 C11 -5.2(5) . . . . ? 
C17 N2 C16 C15 1.2(2) . . . . ? 
C17 N2 C16 C11 -175.4(2) . . . . ? 
C12 C11 C16 C15 -40.2(4) . . . . ? 
C10 C11 C16 C15 142.1(3) . . . . ? 
C12 C11 C16 N2 135.3(2) . . . . ? 
C10 C11 C16 N2 -42.5(3) . . . . ? 
C15 N1 C17 N2 0.6(3) . . . . ? 
C15 N1 C17 C18 -178.2(2) . . . . ? 
C16 N2 C17 N1 -1.1(3) . . . . ? 
C16 N2 C17 C18 177.6(2) . . . . ? 
N1 C17 C18 C19 175.9(2) . . . . ? 
N2 C17 C18 C19 -2.8(4) . . . . ? 
N1 C17 C18 C23 -3.5(3) . . . . ? 
N2 C17 C18 C23 177.9(2) . . . . ? 
C23 C18 C19 C20 -1.1(3) . . . . ? 
C17 C18 C19 C20 179.5(2) . . . . ? 
C18 C19 C20 C21 0.2(4) . . . . ? 
C18 C19 C20 N3 -177.6(2) . . . . ? 
O5 N3 C20 C21 -2.5(3) . . . . ? 
O4 N3 C20 C21 178.3(2) . . . . ? 
O5 N3 C20 C19 175.4(2) . . . . ? 
O4 N3 C20 C19 -3.9(3) . . . . ? 
C19 C20 C21 C22 0.7(4) . . . . ? 
N3 C20 C21 C22 178.5(2) . . . . ? 
C20 C21 C22 C23 -0.6(4) . . . . ? 
C21 C22 C23 O3 178.9(2) . . . . ? 
C21 C22 C23 C18 -0.3(4) . . . . ? 
C19 C18 C23 O3 -178.0(2) . . . . ? 
C17 C18 C23 O3 1.4(3) . . . . ? 
C19 C18 C23 C22 1.1(4) . . . . ? 
C17 C18 C23 C22 -179.5(2) . . . . ? 
C1S O1S1 O1S2 C2S -127.2(6) . . . 2_565 ? 
C2S O1S1 O1S2 C1S 127.2(6) 2_565 . . . ? 
C2S O1S2 C1S O1S1 57.6(7) 2_565 . . . ? 
C2S O1S1 C1S O1S2 -40.3(5) 2_565 . . . ? 
C4S O2S C3S C4S 58.3(3) . . . 2_556 ? 
C3S O2S C4S C3S -57.8(3) . . . 2_556 ? 
 
_diffrn_measured_fraction_theta_max    0.991 
_diffrn_reflns_theta_full              25.05 
_diffrn_measured_fraction_theta_full   0.991 
_refine_diff_density_max    0.334 
_refine_diff_density_min   -0.241 
_refine_diff_density_rms    0.073 
